# Supplementary material for: Diet-Induced Obesity Affects Muscle Regeneration After Murine Blunt Muscle Trauma—A Broad Spectrum Analysis
Source: PubMed Central journal article supplement (PMC5996306; doi:10.3389/fphys.2018.00674), 2018-06-05
Supplement: Image_2.pdf [file Image_2.pdf]

# **Diet-induced obesity affects muscle regeneration after murine blunt muscle trauma – a broad spectrum analysis**

Pengfei Xu<sup>1†</sup>, Jens-Uwe Werner<sup>1†</sup>, Sebastian Milerski<sup>1</sup>, Carmen Hamp<sup>1</sup>, Tatjana Kuzenko<sup>1</sup>, Markus Jähnert<sup>2</sup>, Pascal Gottmann<sup>2</sup>, Luisa de Roy<sup>3</sup>, Daniela Warnecke<sup>3</sup>, Alireza Abaei<sup>4</sup>, Annette Palmer<sup>5</sup>, Markus Huber-Lang<sup>5</sup>, Lutz Dürselen<sup>3</sup>, Volker Rasche<sup>4</sup>, Annette Schürmann<sup>2</sup>, Martin Wabitsch<sup>6\*</sup>, Uwe Knippschild<sup>1\*</sup>

\* Correspondence: Prof. Dr. Uwe Knippschild, [uwe.knippschild@uniklinik-ulm.de](mailto:uwe.knippschild@uniklinik-ulm.de) and Prof. Dr. Martin Wabitsch, [martin.wabitsch@uniklinik-ulm.de](mailto:martin.wabitsch@uniklinik-ulm.de)

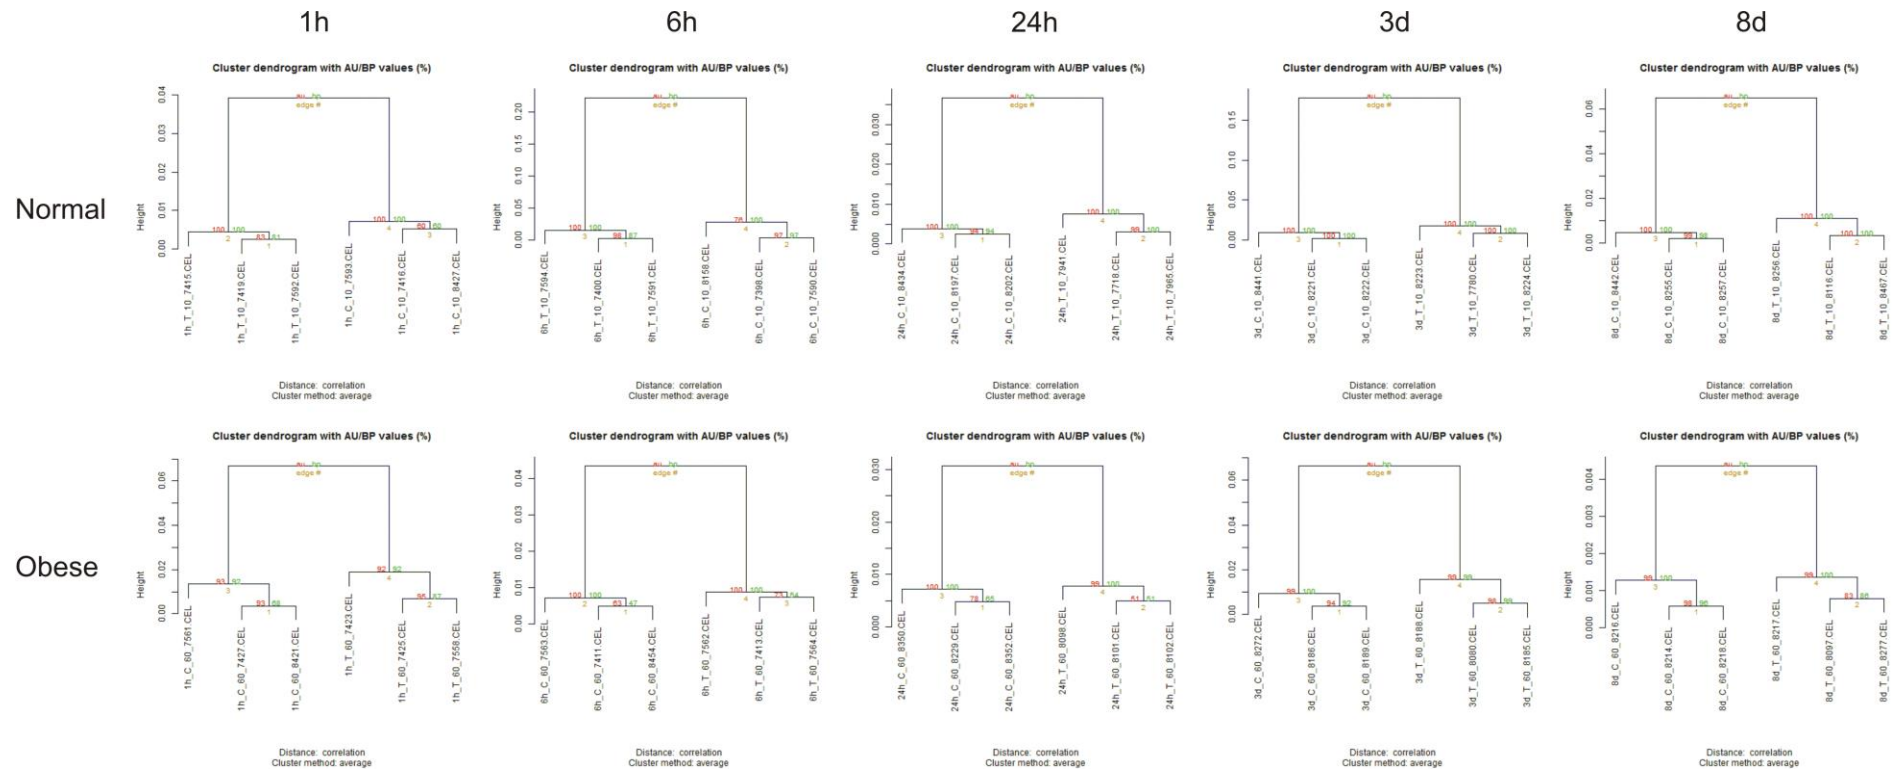

Sup. Fig. 2: Hierarchical cluster analysis (HCA) of muscle tissue from female control and trauma, lean and obese C57BL/6J mice between 1h to 8d post-injury. Red: AU = Approximately Unbiased; Green: BP = Bootstrap Probability, both in percent.
